# Supplementary material for: A Model to Predict Upstaging to Invasive Carcinoma in Patients Preoperatively Diagnosed with Low-Grade Ductal Carcinoma In Situ of the Breast
Source: MDPI journal article supplement (doi:10.3390/cancers14020370), 2022-01-12
Supplement: s1 [file s1]

**Table S1. Association between variables and upstage (implying change of therapy). Results from univariate and multivariate logistic regression analyses.**

| Variable                                              | Level                    | Upstage/Tot (%)      | Univariate analysis |           |         | Multivariate analysis <sup>1</sup> |           |         |
|-------------------------------------------------------|--------------------------|----------------------|---------------------|-----------|---------|------------------------------------|-----------|---------|
|                                                       |                          |                      | OR                  | 95% CI    | P-value | OR                                 | 95% CI    | P-value |
| <b>Overall</b>                                        | -                        | <b>53/295 (18.0)</b> | -                   | -         | -       | -                                  | -         | -       |
| <b>Age at Mammotome biopsy</b>                        | +1 year                  |                      | 0.96                | 0.92-0.99 | 0.021   | 0.96                               | 0.92-1.00 | 0.067   |
| <b>Biopsy needle</b>                                  | 8G + 7G                  | 13/45 (28.9)         | Ref.                | -         | -       | Ref.                               | -         | -       |
|                                                       | 11G + 10G                | 40/245 (16.3)        | 0.48                | 0.23-0.99 | 0.048   | 0.67                               | 0.29-1.54 | 0.34    |
|                                                       | Missing                  | 0/5                  |                     |           |         |                                    |           |         |
| <b>Post biopsy residual disease</b>                   | No                       | 4/128 (3.1)          | Ref.                | -         | -       | Ref.                               | -         | -       |
|                                                       | Yes                      | 49/167 (29.3)        | 12.9                | 4.50-36.8 | <0.001  | 9.40                               | 2.58-34.2 | <0.001  |
| <b>Post biopsy residual lesion size</b>               | +1×log <sub>2</sub> (mm) |                      | 2.00                | 1.50-2.66 | <0.001  | 1.02                               | 0.67-1.55 | 0.93    |
| <b>Number of cores</b>                                | +1                       |                      | 0.99                | 0.93-1.05 | 0.65    | 0.98                               | 0.91-1.04 | 0.45    |
| <b>Disease only in cores with microcalcifications</b> | No                       | 36/132 (27.3)        | Ref.                | -         | -       | Ref.                               | -         | -       |
|                                                       | Yes                      | 13/138 (9.4)         | 0.28                | 0.14-0.55 | <0.001  | 0.38                               | 0.18-0.80 | 0.010   |
|                                                       | Missing                  | 4/25                 |                     |           |         |                                    |           |         |
